# Supplementary material for: ε-Caprolactone polymerization using titanium complexes immobilized onto silica based materials functionalized with ionic liquids: insights into steric, electronic and support effects
Source: Royal Society of Chemistry journal article supplement (doi:10.1039/c6ra01220e), 2016-01-01
Supplement: c6ra01220e1.pdf [file c6ra01220e1.pdf]

**$\epsilon$ -Caprolactone polymerization using titanium complexes immobilized onto silica  
based materials functionalized with ionic liquids: Insights into steric, electronic  
and support effects**

**Electronic Supplementary Information**

Paula Cruz<sup>a</sup>, Yolanda Pérez<sup>a\*</sup>, Isabel del Hierro<sup>a\*</sup>, Rafael Fernández-Galán<sup>b</sup>, Mariano Fajardo<sup>a</sup>

<sup>a</sup>Departamento Biología y Geología, Física y Química Inorgánica (E.S.C.E.T.),  
Universidad Rey Juan Carlos, 28933 Móstoles, Madrid, Spain. Tel.: (+34) 914887022  
Fax: (+34) 914888143

E-mail: [yolanda.cortes@urjc.es](mailto:yolanda.cortes@urjc.es)

<sup>b</sup>Departamento Química Inorgánica, Orgánica y Bioquímica, Facultad de Ciencias y  
Tecnologías Químicas, Universidad de Castilla-La Mancha, Campus Universitario de  
Ciudad Real, 13071-Ciudad Real, Spain.

## 1. Preparation of ionic liquids

### 1.1. Preparation of 1-methyl-3-[(triethoxysilyl)propyl]imidazolium chloride (IMILCl)

The ionic liquid 1-methyl-3-[(triethoxysilyl)propyl]imidazolium chloride (IMILCl) was synthesized according to the procedure reported in the literature.<sup>[1]</sup> In the experiment, 1-methyl-imidazol (2.2 mL, 28 mmol) and (3-chloropropyl) triethoxysilane (6.7 mL, 28 mmol) were mixed and heated at 95 °C for 24 h under nitrogen atmosphere. After cooling the reaction mixture to room temperature and washing with hexane, a yellow viscous ionic liquid IMILCl was obtained.

### 1.2. Preparation of 1-methyl-3-[(triethoxysilyl)propyl]imidazolium hexafluorophosphate (IMILPF<sub>6</sub>) and 1-methyl-3-[(triethoxysilyl)propyl]imidazolium tetrafluoroborate (IMILBF<sub>4</sub>)

A solution of NaBF<sub>4</sub> (1.15 g, 10.5 mmol) or KPF<sub>6</sub> (1.93 g, 10.5 mmol) in 30 mL of acetone was added over IMILCl (3.23 g, 10 mmol). The mixture was stirred at room temperature for 6 days and then filtered off. The solvent was evaporated under reduced pressure and the remaining oil extracted in dichloromethane. A yellow viscous liquid was obtained by removing the solvent. The products were labelled IMILPF<sub>6</sub> and IMILBF<sub>4</sub>.

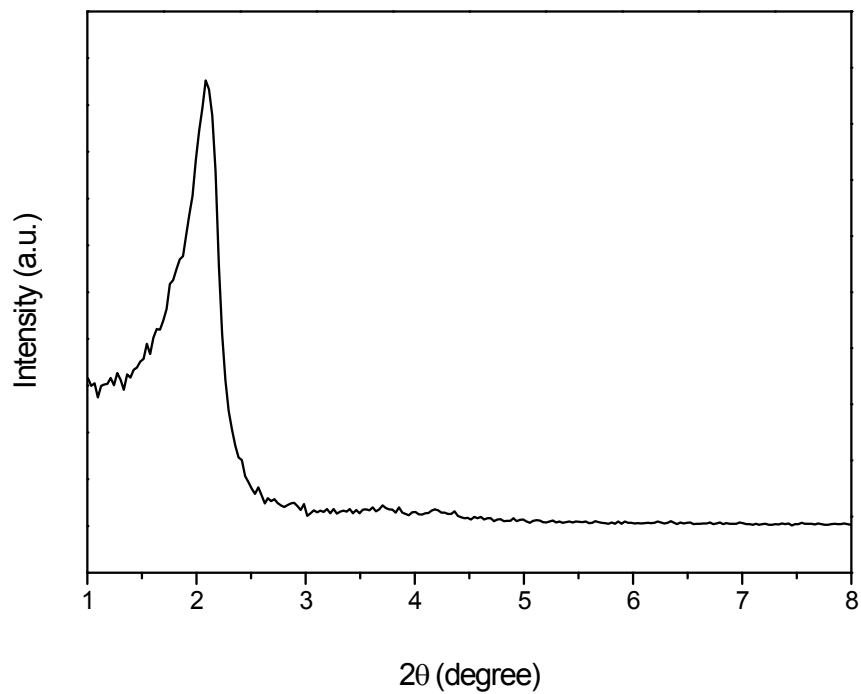

Fig. S1. Small-angle XRD patterns of Ti-CoIMILCl-MSN

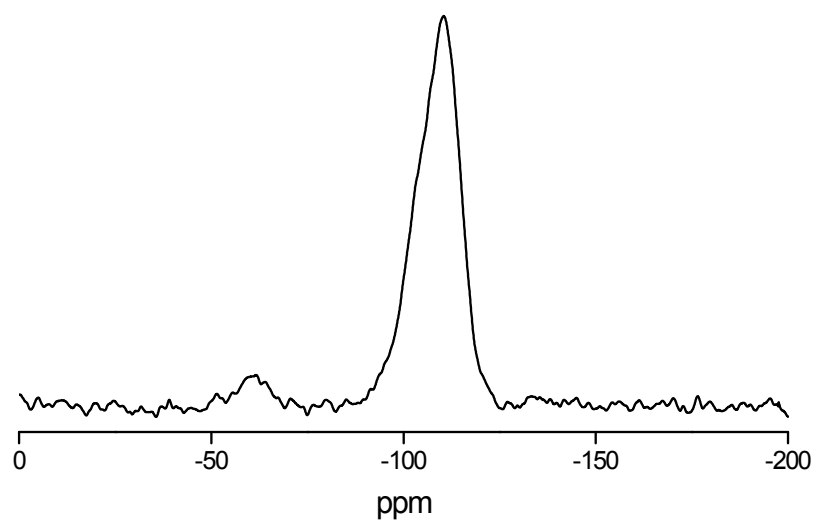

Fig. S2.  $^{29}\text{Si}$  CP-MAS NMR spectrum of Ti-IMILCl-MSN

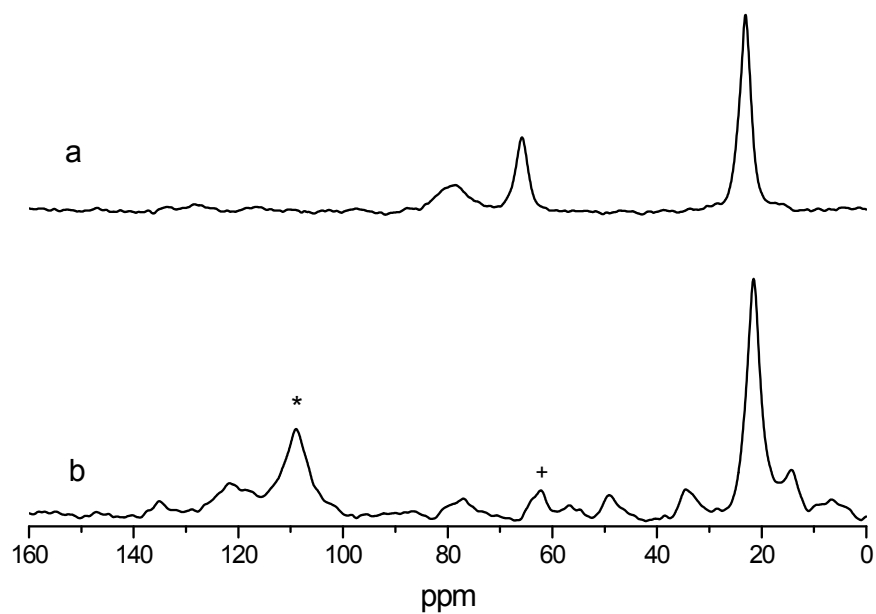

Fig. S3. a)  $^{13}\text{C}$  CP-MAS NMR spectrum of 9.45%Ti-MSN and b)  $^{13}\text{C}$  PDA-MAS NMR spectrum of 5.4%Ti-CoIMILCl-SiO<sub>2</sub> (\*Rotor +Sb rotor)

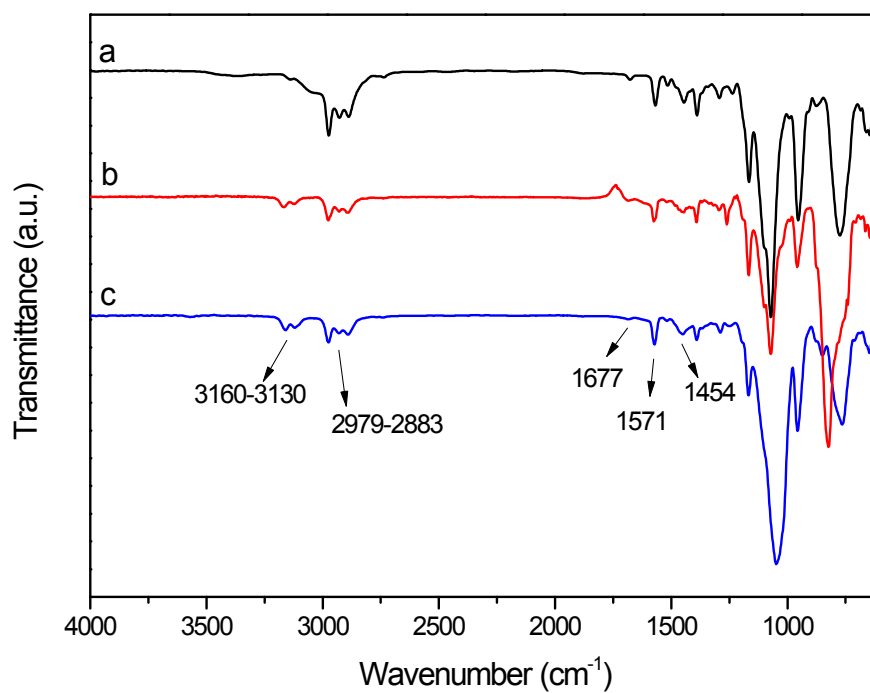

Fig. S4. FT-IR spectra of ionic liquids a) IMILCl, b) IMILPF<sub>6</sub> and c) IMILBF<sub>4</sub>

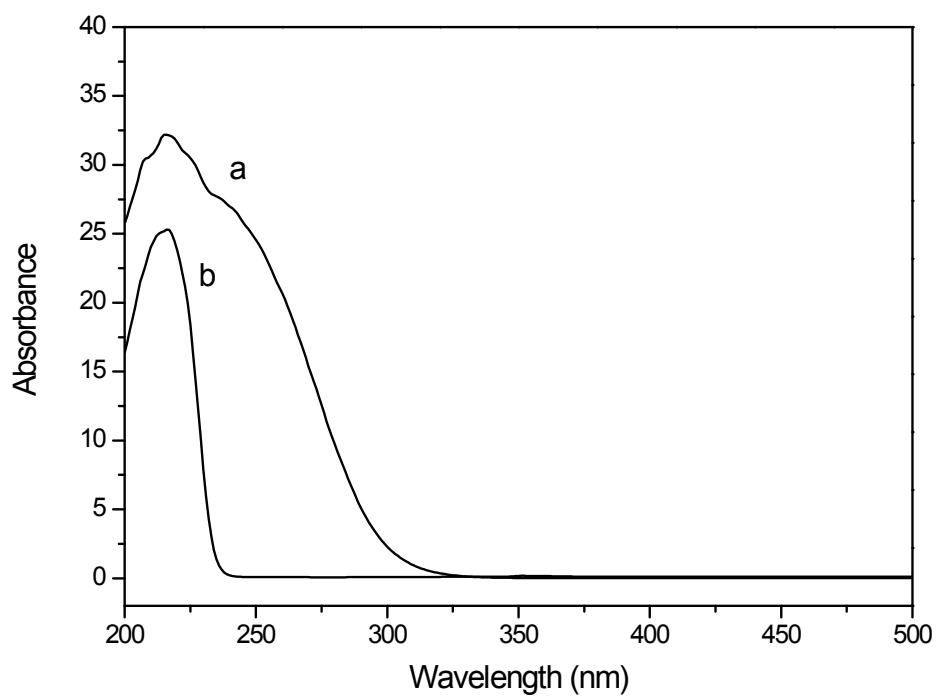

Fig. S5. UV-vis absorption spectra of a) 5.4%Ti-CoIMILCl-SiO<sub>2</sub> catalyst and b) CoIMILCl-SiO<sub>2</sub>

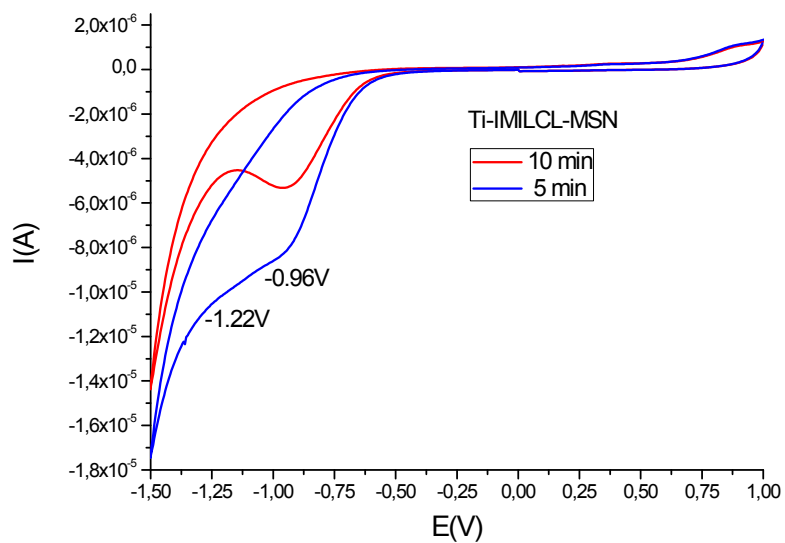

Fig S6. Cyclic voltammogram (scan rate  $100 \text{ mV s}^{-1}$ ) of Ti-IMILCL-MSN at different times after immersion in aqueous phosphate buffer pH 7.4 as electrolyte vs Ag/AgCl/KCl (3M) as reference electrode



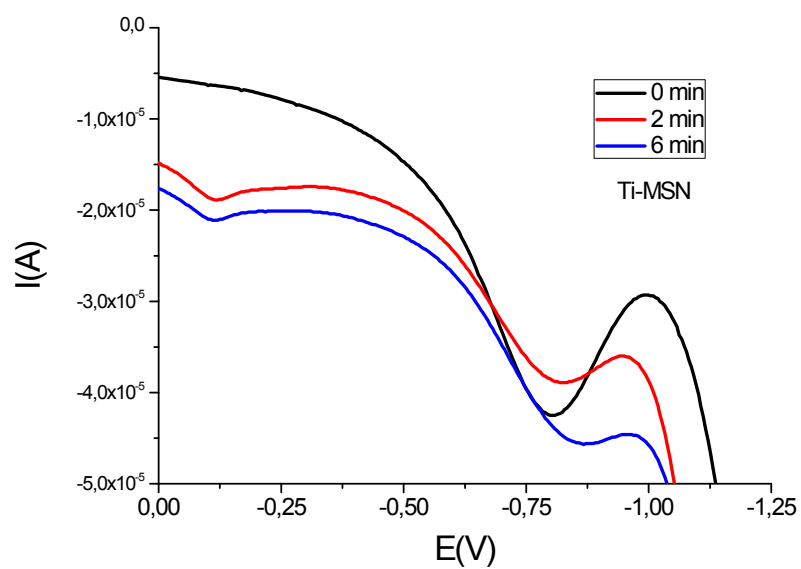

Fig. S7. Differential pulse voltammogram (200 mV modulation amplitude) of Ti-MSN material at different times after immersion in aqueous phosphate buffer pH 7.4 as electrolyte vs Ag/AgCl/KCl (3M) as reference electrode

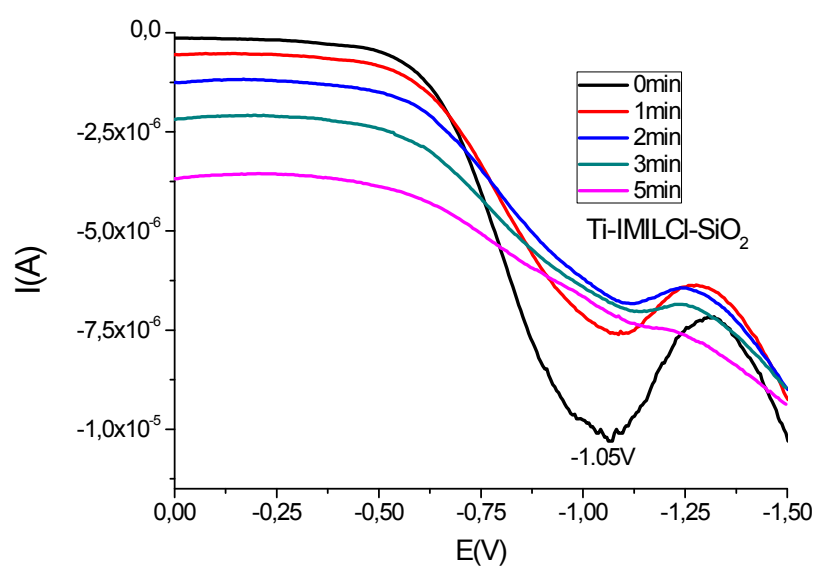

Fig. S8. Differential pulse voltammogram (75 mV modulation amplitude) of Ti-IMILCl-SiO<sub>2</sub> material at different times after immersion in aqueous phosphate buffer pH 7.4 as electrolyte vs Ag/AgCl/KCl (3M) as reference electrode

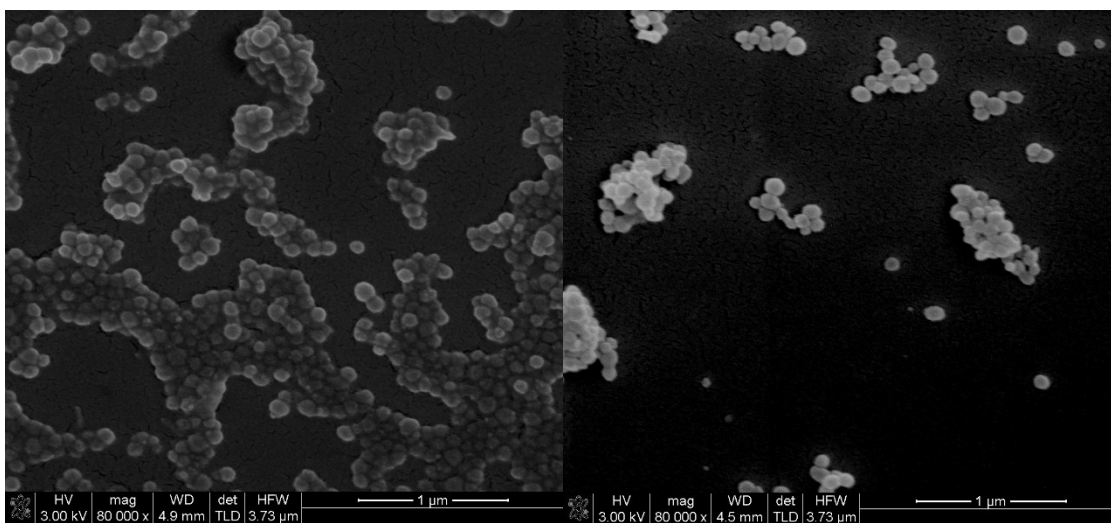

Fig. S9. SEM images of MSN

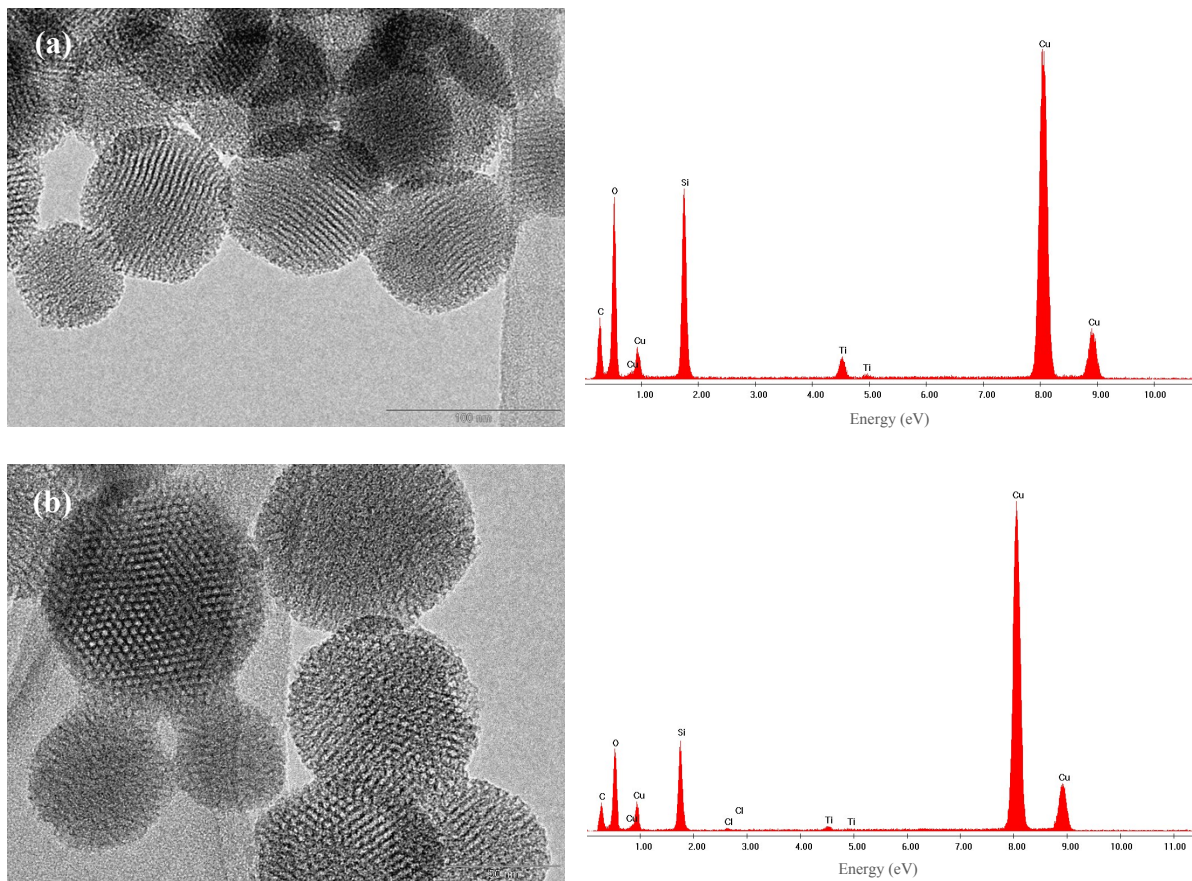

Fig. S10. a) TEM image and EDX spectrum of 9.45%Ti-MSN and b) TEM image and EDX spectrum of Ti-IMILCl-MSN

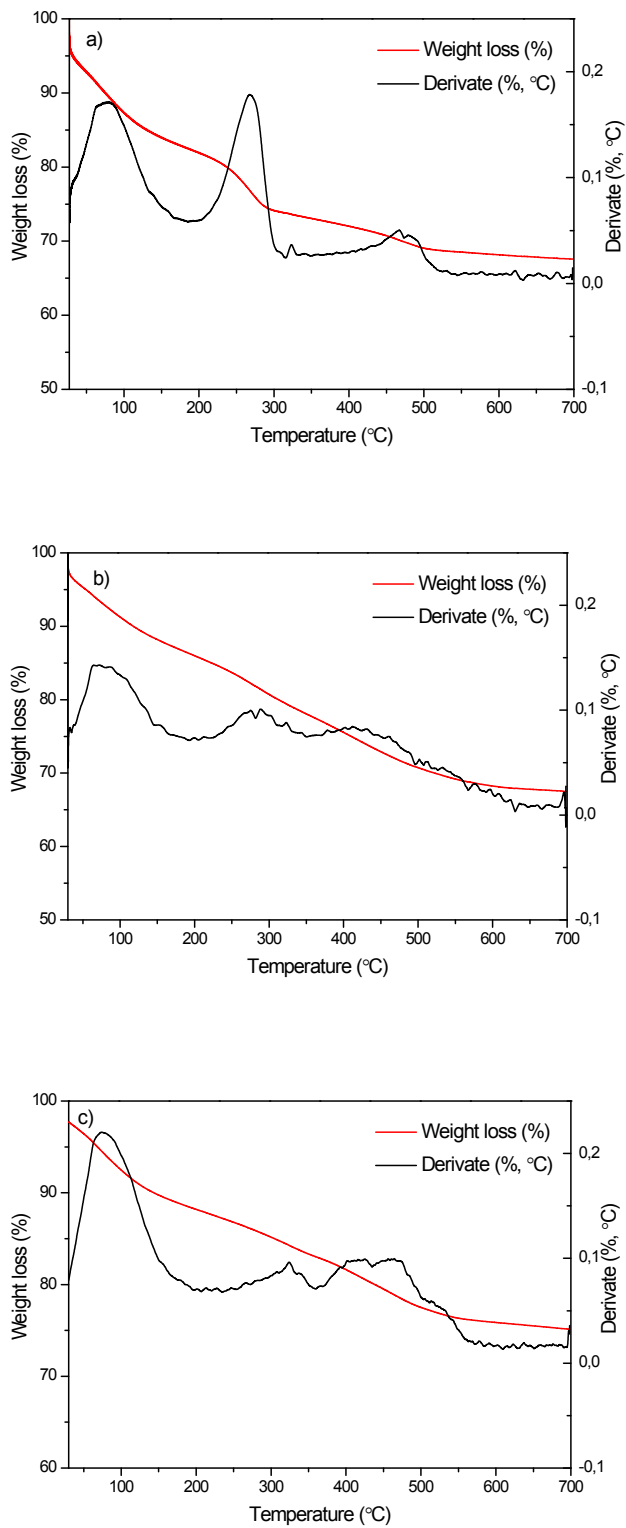

Fig. S11. Thermogravimetric analysis of titanium containing materials a) 9.45%Ti-MSN  
 b) Ti-IMILCl-MSN, and c) IMILCl-Ti-MSN

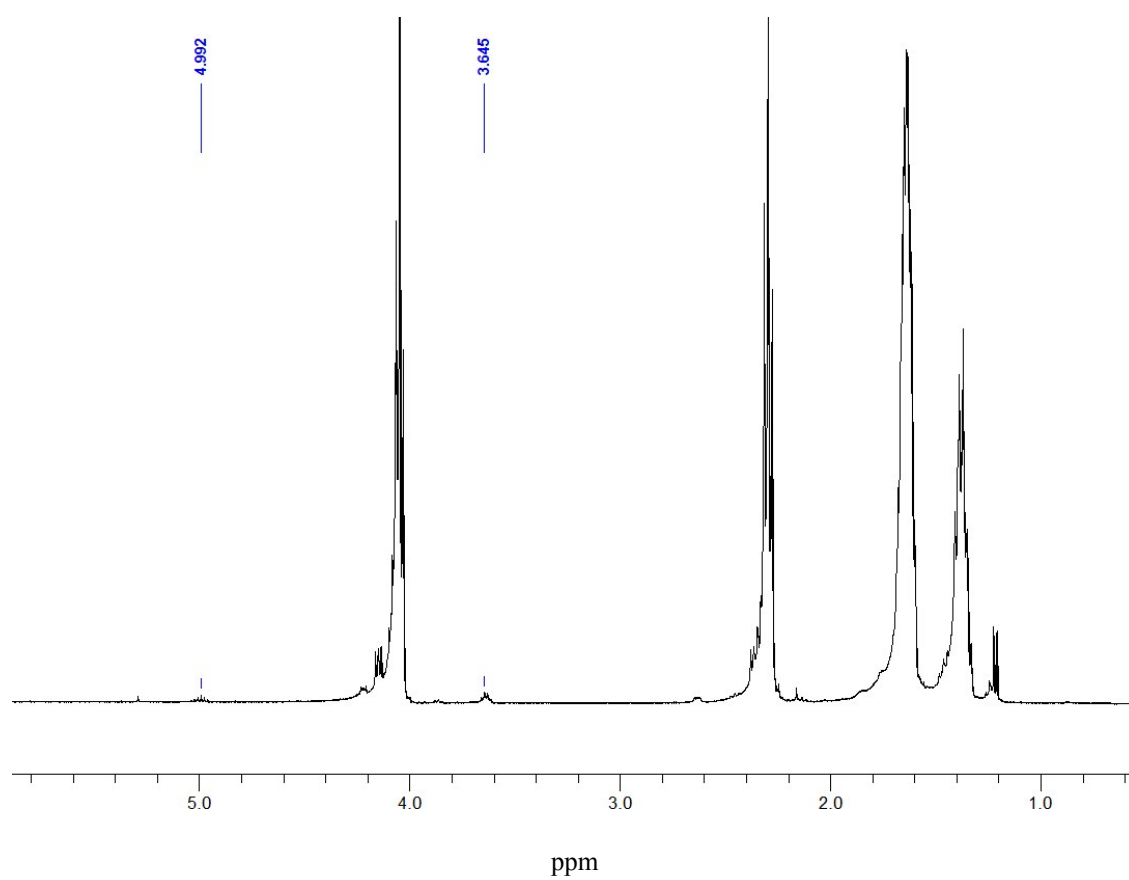

Fig. S12. <sup>1</sup>H NMR spectrum (measured in CDCl<sub>3</sub>, 400 MHz) of the polymer obtained from the polymerization of  $\epsilon$ -CL initiated with Ti-IMILCl-MSN ( $M_0/I_0 = 100$ ). The proposed coordination insertion mechanism.

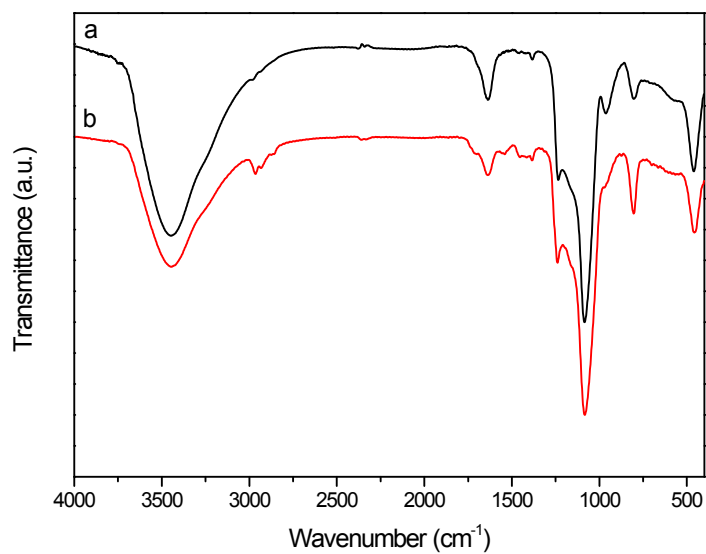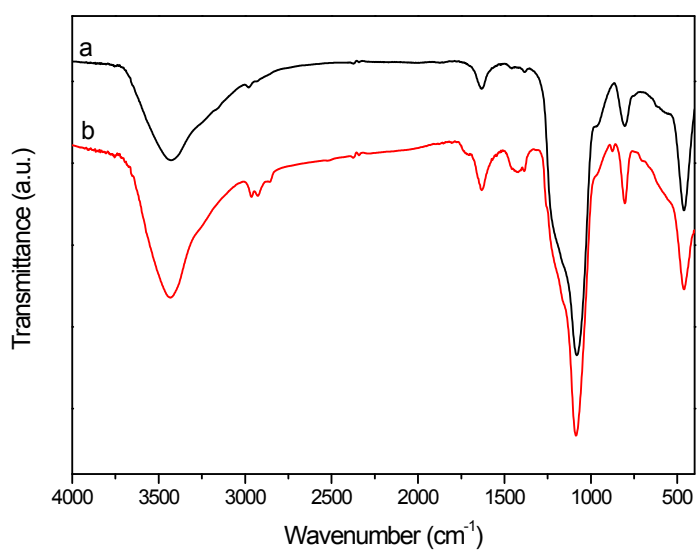

Fig. S13. FTIR spectra of fresh and reused catalysts a) 3.7%Ti-MSN (top) and 3.7%Ti-MSN-R (bottom) and b) IMILCl-Ti-SBA-15 (top) and IMILCl-Ti-SBA-15-R (bottom)

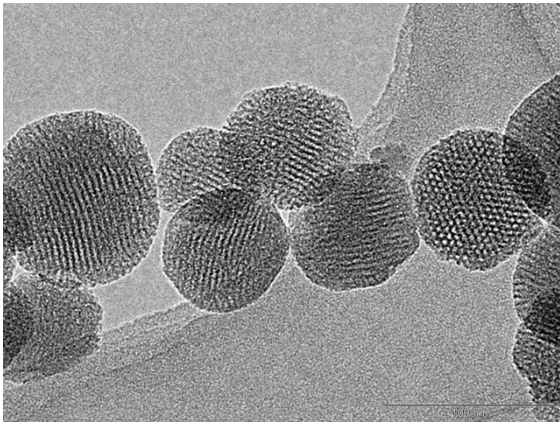

Fig. S14. TEM image of 3.7%Ti-MSN-R



---

[1] H. Wang, B. Wang, C.-L. Liu, W.-S. Dong, *Microporous and Mesoporous Materials* 134 (2010) 51–57.
